# Supplementary material for: Genome-wide computational analysis of potential long noncoding RNA mediated DNA:DNA:RNA triplexes in the human genome
Source: PubMed Central journal article supplement (PMC7670996; doi:10.1186/s12967-017-1282-9), 2017-09-02
Supplement: 12967_2017_1282_MOESM2_ESM.pdf [file 12967_2017_1282_MOESM2_ESM.pdf]

|               | Type of Motif | L10E10   | L20E10 | L30E20 | L30E10 | L35E20   | L40E20   |
|---------------|---------------|----------|--------|--------|--------|----------|----------|
| <b>HOTAIR</b> | <b>R</b>      | -        | 44.55  | 61.95  | 33.33  | 93.14(*) | 100(*)   |
|               | <b>Y</b>      | -        | 0      | 0.50   | 0      | 0(*)     | 0(*)     |
|               | <b>M</b>      | -        | 55.45  | 37.55  | 66.67  | 6.86(*)  | 0(*)     |
| <b>MALAT1</b> | <b>R</b>      | -        | 18.93  | 65.59  | 100    | 72.77(*) | 92.86(*) |
|               | <b>Y</b>      | -        | 0.67   | 0.19   | 0      | 0(*)     | 0(*)     |
|               | <b>M</b>      | -        | 80.40  | 34.22  | 0      | 27.23(*) | 7.14(*)  |
| <b>FENDRR</b> | <b>R</b>      | -        | 68.91  | 37.57  | 0      | 66.67(*) | 0        |
|               | <b>Y</b>      | -        | 15.96  | 62.43  | 0      | 33.33(*) | 0        |
|               | <b>M</b>      | -        | 15.13  | 0      | 0      | 0(*)     | 0        |
| <b>DHFR</b>   | <b>R</b>      | 19.15(*) | 0      | 0      | 0      | 0        | 0        |
|               | <b>Y</b>      | 34.78(*) | 0      | 0      | 0      | 0        | 0        |
|               | <b>M</b>      | 47.57(*) | 0      | 0      | 0      | 0        | 0        |

L: length; E: error rate; R:Purine motif; Y:Pyrimidine motif ; M: purine-pyrimidine motif; (\*) marked: values at the parameter used in our study.
