# Supplementary material for: Genome-wide computational analysis of potential long noncoding RNA mediated DNA:DNA:RNA triplexes in the human genome
Source: PubMed Central journal article supplement (PMC7670996; doi:10.1186/s12967-017-1282-9), 2017-09-02
Supplement: 12967_2017_1282_MOESM10_ESM.pdf [file 12967_2017_1282_MOESM10_ESM.pdf]

|             | <b>Housekeeping genes+</b> | <b>Tissue specific genes</b> |                                        |
|-------------|----------------------------|------------------------------|----------------------------------------|
| <b>PTS+</b> | 577672                     | 0                            | Chi-square 932054.574<br>and P-value 0 |
| <b>PTS-</b> | 345666                     | 1054696                      |                                        |
