# Supplementary material for: Genome-wide computational analysis of potential long noncoding RNA mediated DNA:DNA:RNA triplexes in the human genome
Source: Springer Nature journal article supplement (doi:10.1186/s12967-017-1282-9), 2017-09-02
Supplement: MOESM1 [file 14970934]

| Parameter | Full Form            | Definition                                                                                                                                                                                                                                                                                                                                            | Default value   | Value used in our study |
|-----------|----------------------|-------------------------------------------------------------------------------------------------------------------------------------------------------------------------------------------------------------------------------------------------------------------------------------------------------------------------------------------------------|-----------------|-------------------------|
| -l        | --lower-length-bound | The minimum length of a TFO, TTS or triplex target sites (TTS-TFO pair)                                                                                                                                                                                                                                                                               | 15              | 35                      |
| -e        | --error-rate         | The maximal error-rate in % which is allowed for prediction. A match of a feature R with E errors has error-rate of $100 \cdot (E/ R )$ , whereby $ R $ is the feature length.                                                                                                                                                                        | 5               | 10                      |
| -g        | --min-guanine        | The minimum guanine content in triplex features. Value ranges between 0 and 100. The minimum guanine rate controls the ratio of guanines required in the any TTS.                                                                                                                                                                                     | <10%            | <20%                    |
| -m        | --triplex-motifs     | Specifies the motifs from the canonical triplex-formation rules to be used when searching for TFOs in the third strand:<br>R - the purine motif that permit guanines (G) and adenines (A)<br>Y - the pyrimidine motif that permit cytosines (C) and thymines (T)<br>M - the mixed motif, purine-pyrimidine, that permit guanines (G) and thymines (T) | R,Y,M           | R, Y,M                  |
| -fm       | --filtering-mode     | This discards the non-hits<br>0 = greedy approach<br>1 = q-gram filtering                                                                                                                                                                                                                                                                             | 0               | 0                       |
| -of       | --output-format      | Type of output format<br>0 = Tab-separated Format + Summary Format<br>1 = Triplexator Format + Summary Format<br>2 = Summary Format only                                                                                                                                                                                                              | To be specified | 1                       |
| -fr       | --filter-repeats     | Activates the filtering of low complexity regions and repeats in the sequence data. It is deactivated as it greatly increases the memory consumption and runtime of Triplexator. However, many repeat regions comply with triplex-formation rules.                                                                                                    | off             | off                     |
