# Supplementary material for: Genome-wide computational analysis of potential long noncoding RNA mediated DNA:DNA:RNA triplexes in the human genome
Source: Springer Nature journal article supplement (doi:10.1186/s12967-017-1282-9), 2017-09-02
Supplement: MOESM11 [file 14970934]

**[A] Chi-square test to check the mapping significance of UTA Transcription Factor Binding sites (UTA TFBS) with Potential Triplex Sites.**

| Cell Line and TF     | A       | B       | C        | D          | Chi square  | p value |
|----------------------|---------|---------|----------|------------|-------------|---------|
| Fibrobl Ctf Rep1     | 828303  | 2985288 | 9875771  | 3123471902 | 51320569.21 | 0       |
| Gm10248 Ctf Rep1     | 848380  | 2965211 | 9317814  | 3124029859 | 56809037.75 | 0       |
| Gm10266 Ctf Rep1     | 959394  | 2854197 | 9835167  | 3123512506 | 68557480.28 | 0       |
| Gm13976 Ctf Rep1     | 539629  | 3273962 | 7147186  | 3126200487 | 30204266.56 | 0       |
| Gm20000 Ctf Rep1     | 647438  | 3166153 | 7339443  | 3126008230 | 42046822.83 | 0       |
| Kidneyoc Ctf Rep1    | 1810641 | 2002950 | 7933129  | 3125414544 | 274358812.5 | 0       |
| Lncap Ctf Andro Rep1 | 836269  | 2977322 | 9427522  | 3123920151 | 54636350.8  | 0       |
| Lncap Ctf Rep1       | 808834  | 3004757 | 10709302 | 3122638371 | 45341647.79 | 0       |
| LungOC Ctf Rep1      | 1780946 | 2032645 | 7875427  | 3125472246 | 267801719.7 | 0       |
| Mcf7 Cmyc Estro Rep1 | 232706  | 3580885 | 2978782  | 3130368891 | 13439692.78 | 0       |
| Pancreas OC Ctf Rep1 | 840534  | 2973057 | 9610934  | 3123736739 | 54185643.79 | 0       |
| Progfib Ctf Rep1     | 1181731 | 2631860 | 8992654  | 3124355019 | 111053480.8 | 0       |
| Spleen OC Ctf Rep1   | 926643  | 2886948 | 11549379 | 3121798294 | 55065143.27 | 0       |

A: Unique number of bases of mapping between PTS and UTA TFBS; B: Unique number of bases of PTS not mapping to UTA TFBS;

C: Unique number of bases of UTA TFBS not mapping to PTS domains and D: Total unique bases of (A+B+C) minus from unique bases of human genome

**[B] Chi-square test to check the mapping significance of HAIB Transcription Factor Binding sites (HAIB TFBS) with Potential Triplex Sites.**

| Cell Line and TF   | A       | B       | C       | D          | Chi square | p value |
|--------------------|---------|---------|---------|------------|------------|---------|
| A549 Gr            | 9928    | 3803663 | 274903  | 3133072770 | 265505.313 | 0       |
| A549 Sin3ak20      | 507496  | 3306095 | 5833870 | 3127513803 | 32508534.5 | 0       |
| Ecc1 Nrsf          | 501691  | 3311900 | 4315837 | 3129031836 | 42096699.3 | 0       |
| Ecc1 Nrsf          | 493407  | 3320184 | 4568413 | 3128779260 | 38693319.3 | 0       |
| Gm12878 Egr1       | 84624   | 3728967 | 873669  | 3132474004 | 5988424.16 | 0       |
| Gm12878 Ets1       | 90869   | 3722722 | 455989  | 3132891684 | 12257049.2 | 0       |
| Gm12878 tlr4sc6059 | 1310025 | 2503566 | 1.4E+07 | 3119179210 | 89154580.6 | 0       |
| Gm12878 Nrsf       | 305462  | 3508129 | 3173665 | 3130174008 | 21505367.2 | 0       |
| Gm12878 Nrsf       | 103553  | 3710038 | 1375453 | 3131972220 | 5768702.72 | 0       |
| Gm12878 Nrsf       | 48350   | 3765241 | 967838  | 3132379835 | 1799743.21 | 0       |
| Gm12878 P300       | 718564  | 3095027 | 8052867 | 3125294806 | 47186951.2 | 0       |
| Gm12878 P300       | 429062  | 3384529 | 2488236 | 3130859437 | 51166460.2 | 0       |
| Gm12878 Pbx3       | 444551  | 3369040 | 4080486 | 3129267187 | 35136965.4 | 0       |
| Gm12878 Pou2f2     | 486783  | 3326808 | 6630436 | 3126717237 | 26515583   | 0       |
| Gm12878 Rxra       | 284871  | 3528720 | 2707915 | 3130639758 | 21787235.3 | 0       |
| Gm12878 Zbtb33     | 554634  | 3258957 | 5478853 | 3127868820 | 40968389.5 | 0       |
| Gm12878 Zbtb33     | 620675  | 3192916 | 5420287 | 3127927386 | 51386910.4 | 0       |

|                     |        |         |         |            |            |   |
|---------------------|--------|---------|---------|------------|------------|---|
| H1hesc Bcl11a       | 56026  | 3757565 | 624368  | 3132723305 | 3689143.66 | 0 |
| H1hesc Bcl11a       | 37802  | 3775789 | 347609  | 3133000064 | 2978909.83 | 0 |
| H1hesc Egr1         | 147738 | 3665853 | 1148619 | 3132199054 | 13578617.8 | 0 |
| H1hesc Fosl1sc183   | 38203  | 3775388 | 163184  | 3133184489 | 5893027.01 | 0 |
| H1hesc Nrsf         | 383229 | 3430362 | 4207249 | 3129140424 | 25626251.6 | 0 |
| H1hesc Nrsf         | 430420 | 3383171 | 4853472 | 3128494201 | 28069476.6 | 0 |
| H1hesc Pou5f1sc9081 | 46957  | 3766634 | 554031  | 3132793642 | 2929065.37 | 0 |
| H1hesc Rxra         | 46450  | 3767141 | 299677  | 3133047996 | 5042095.51 | 0 |
| H1hesc Six5         | 83950  | 3729641 | 815224  | 3132532449 | 6290274.56 | 0 |
| H1hesc Sp2          | 66810  | 3746781 | 590999  | 3132756674 | 5456904.96 | 0 |
| Hct116 Nrsf         | 221560 | 3592031 | 1236982 | 3132110691 | 27290902   | 0 |
| Hct116 Nrsf         | 299348 | 3514243 | 1613101 | 3131734572 | 38017773.4 | 0 |
| Hct116 Zbtb33       | 72494  | 3741097 | 461901  | 3132885772 | 7956612.08 | 0 |
| Helas3 Gabp         | 300573 | 3513018 | 3216640 | 3130131033 | 20581414.1 | 0 |
| Hepg2 Gabp          | 218312 | 3595279 | 2645711 | 3130701962 | 13284425.9 | 0 |
| Hepg2 Nrsf          | 81115  | 3732476 | 837933  | 3132509740 | 5736883.11 | 0 |
| Hepg2 Nrsf          | 85007  | 3728584 | 1275298 | 3132072375 | 4208521.64 | 0 |
| Hepg2 Nrsf          | 261357 | 3552234 | 2028842 | 3131318831 | 24062527.8 | 0 |
| Hepg2 Sp1           | 124113 | 3689478 | 1348439 | 3131999234 | 8372980.14 | 0 |

|               |        |         |         |            |            |   |
|---------------|--------|---------|---------|------------|------------|---|
| Hepg2 Sp2     | 164910 | 3648681 | 1360022 | 3131987651 | 14367018.2 | 0 |
| Hepg2 Zbtb33  | 281046 | 3532545 | 2838748 | 3130508925 | 20313806.6 | 0 |
| Hepg2 Zbtb33  | 73211  | 3740380 | 440859  | 3132906814 | 8442803.26 | 0 |
| Hepg2 Zbtb33  | 106796 | 3706795 | 598220  | 3132749453 | 13114179.2 | 0 |
| Hl60 Nrsf     | 327816 | 3485775 | 2301165 | 3131046508 | 33041413.5 | 0 |
| K562 Six5     | 503306 | 3310285 | 4732954 | 3128614719 | 38908493.9 | 0 |
| K562 Sp2sc643 | 146185 | 3667406 | 1416679 | 3131930994 | 10976642.1 | 0 |
| K562 Srf      | 51046  | 3762545 | 475189  | 3132872484 | 3977349.33 | 0 |
| K562 Zbtb33   | 532285 | 3281306 | 5153259 | 3128194414 | 40057437.5 | 0 |
| K562 Zbtb33   | 840969 | 2972622 | 6074295 | 3127273378 | 82739801.4 | 0 |
| Mcf7 Nrsf     | 353944 | 3459647 | 3613150 | 3129734523 | 25337355.7 | 0 |
| Mcf7 Nrsf     | 430842 | 3382749 | 3430855 | 3129916818 | 38780009.7 | 0 |
| Panc1 Nrsf    | 213631 | 3599960 | 2476653 | 3130871020 | 13559211.1 | 0 |
| Panc1 Nrsf    | 75026  | 3738565 | 1026257 | 3132321416 | 4062275.31 | 0 |
| Panc1 Nrsf    | 331866 | 3481725 | 1733311 | 3131614362 | 43290203   | 0 |
| Panc1 Nrsf    | 308857 | 3504734 | 2351253 | 3130996420 | 28944948.7 | 0 |
| Pfsk1 Nrsf    | 83397  | 3730194 | 1171837 | 3132175836 | 4399886.78 | 0 |
| Pfsk1 Nrsf    | 171907 | 3641684 | 2421034 | 3130926639 | 9053377.23 | 0 |
| Sknmc Foxp2   | 116798 | 3696793 | 832927  | 3132514746 | 11601310.3 | 0 |

|             |         |         |         |            |            |   |
|-------------|---------|---------|---------|------------|------------|---|
| Sknmc Foxp2 | 1353814 | 2459777 | 8092817 | 3125254856 | 157573316  | 0 |
| Sknsh Nrnf  | 16333   | 3797258 | 339278  | 3133008395 | 585650.091 | 0 |
| U87 Nrnf    | 88741   | 3724850 | 715135  | 3132632538 | 7893761.45 | 0 |
| U87 Nrnf    | 107581  | 3706010 | 797142  | 3132550531 | 10324915.6 | 0 |
| U87 Nrnf    | 264232  | 3549359 | 2017580 | 3131330093 | 24692872.7 | 0 |
| U87 Nrnf    | 216176  | 3597415 | 1927131 | 3131420542 | 17539862.1 | 0 |

A: Unique number of bases of mapping between PTS and HAIB TFBS; B: Unique number of bases of PTS not mapping to HAIB TFBS;

C: Unique number of bases of HAIB TFBS not mapping to PTS domains and D: Total unique bases of (A+B+C) minus from unique bases of human genome

**[C] Chi-square test to check the mapping significance of SYDH Transcription Factor Binding sites (SYDH TFBS) with Potential Triplex Sites.**

| Cell Line and TF  | A       | B       | C        | D          | Chi square  | p value |
|-------------------|---------|---------|----------|------------|-------------|---------|
| Gm08714 Znf274    | 94521   | 3719070 | 927148   | 3132420525 | 7016658.963 | 0       |
| Gm12878 Brca1a300 | 351576  | 3462015 | 3481582  | 3129866091 | 25891353.5  | 0       |
| H1hesc Znf274m01  | 161118  | 3652473 | 1132269  | 3132215404 | 16216307.89 | 0       |
| Hek293t Znf263    | 3342560 | 471031  | 29277562 | 3104070111 | 278341112.3 | 0       |
| Helas3 Bdp1       | 54832   | 3758759 | 242488   | 3133105185 | 8220001.598 | 0       |
| Helas3 Brf1       | 47935   | 3765656 | 142378   | 3133205295 | 9848999.957 | 0       |
| Helas3 Brf2       | 63498   | 3750093 | 47351    | 3133300322 | 29832485.76 | 0       |
| Helas3 Brg1       | 12658   | 3800933 | 72271    | 3133275402 | 1528633.868 | 0       |
| Helas3 Gcn5       | 183648  | 3629943 | 688845   | 3132658828 | 31479756    | 0       |
| Helas3 Prdm19115  | 311597  | 3501994 | 3882310  | 3129465363 | 18473566.55 | 0       |
| Helas3 Rpc155     | 240241  | 3573350 | 1547879  | 3131799794 | 26120502.84 | 0       |
| Helas3 Spt20      | 25175   | 3788416 | 178949   | 3133168724 | 2507266.128 | 0       |
| Helas3 Tcf7l2     | 252045  | 3561546 | 1525711  | 3131821962 | 28945539.84 | 0       |
| Helas3 Tf3c110    | 335063  | 3478528 | 2301191  | 3131046482 | 34436124.06 | 0       |
| Helas3 Znf274     | 52039   | 3761552 | 157141   | 3133190532 | 10559491.41 | 0       |
| Hepg2 Erra        | 11289   | 3802302 | 186651   | 3133161022 | 507951.292  | 0       |
| Hepg2 Jund        | 3421388 | 392203  | 22691400 | 3110656273 | 365440095.6 | 0       |

|               |         |         |          |            |             |   |
|---------------|---------|---------|----------|------------|-------------|---|
| Imr90 Ctcfb   | 1561651 | 2251940 | 17780727 | 3115566946 | 101367261.2 | 0 |
| K562 Atf3     | 39999   | 3773592 | 287407   | 3133060266 | 3945499.288 | 0 |
| K562 Gata1    | 106163  | 3707428 | 677893   | 3132669780 | 11630692.36 | 0 |
| K562 Pol2s2   | 3204279 | 609312  | 28017762 | 3105329911 | 267131156.4 | 0 |
| K562 Pol3     | 5621    | 3807970 | 44867    | 3133302806 | 504244.235  | 0 |
| K562 Rpc155   | 63488   | 3750103 | 426146   | 3132921527 | 6654707.268 | 0 |
| K562 Sirt6    | 85663   | 3727928 | 228440   | 3133119233 | 19072547.03 | 0 |
| K562 Stat1    | 62518   | 3751073 | 445357   | 3132902316 | 6214904.117 | 0 |
| K562 Tr4      | 29745   | 3783846 | 135548   | 3133212125 | 4349506.27  | 0 |
| K562Xrcc4 Std | 19686   | 3793905 | 1618     | 3133346055 | 14943225.05 | 0 |
| K562 Znf263   | 166581  | 3647010 | 1616871  | 3131730802 | 12490759.56 | 0 |
| K562 Znf274   | 25988   | 3787603 | 257584   | 3133090089 | 1910091.65  | 0 |
| Nt2d1 Suz12   | 304277  | 3509314 | 3045736  | 3130301937 | 22181114.81 | 0 |

A: Unique number of bases of mapping between PTS and SYDH TFBS; B: Unique number of bases of PTS not mapping to HAIB TFBS; C: Unique number of bases of HAIB TFBS not mapping to PTS domains and D: Total unique bases of (A+B+C) minus from unique bases of human genome
