# Supplementary material for: Genome-wide computational analysis of potential long noncoding RNA mediated DNA:DNA:RNA triplexes in the human genome
Source: Springer Nature journal article supplement (doi:10.1186/s12967-017-1282-9), 2017-09-02
Supplement: MOESM22 [file 14970934]

**[A] Chi-square test to check the mapping significance of Hi-C interaction domain with Potential Triplex Sites forming purine motif (R).**

| Hi-C data                      | A      | B         | C       | D          | Chi-square | P value    |
|--------------------------------|--------|-----------|---------|------------|------------|------------|
| CCHiC-HeLaS3CCL2p2-G1-0.25FA   | 80566  | 68272040  | 3733025 | 3065075633 | 78.516     | 0          |
| CCHiC-HeLaS3CCL2p2-G1-1FA      | 90542  | 76471043  | 3723049 | 3056876630 | 70.452     | 0          |
| CCHiC-HeLaS3CCL2p2-M-0.25FA    | 19332  | 16401766  | 3794259 | 3116945907 | 19.999     | 0.00000775 |
| CCHiC-HeLaS3CCL2p2-M-1FA       | 30757  | 14170082  | 3782834 | 3119177591 | 10609.17   | 0          |
| CCHiC-HeLaS3CCL2p2-M-98percent | 130863 | 26151746  | 3682728 | 3107195927 | 309190.6   | 0          |
| CCHiC-HeLaS3-G1mid-R1          | 29352  | 25089599  | 3784239 | 3108258074 | 46.263     | 0          |
| CCHiC-HeLaS3-G1mid-R2          | 16715  | 14184124  | 3796876 | 3119163549 | 17.484     | 0.00002897 |
| CCHiC-HeLaS3-M-R1              | 40210  | 34198481  | 3773381 | 3099149192 | 48.434     | 0          |
| CCHiC-HeLaS3-M-R2              | 31090  | 26372254  | 3782501 | 3106975419 | 31.862     | 2.00E-08   |
| CCHiC-HFF1-M-R1                | 126330 | 105952476 | 3687261 | 3027395197 | 55.219     | 0          |
| CCHiC-HFF1-NS-R1               | 151462 | 126894575 | 3662129 | 3006453098 | 59.9       | 0          |
| CCHiC-K562-M-R1                | 21482  | 18279234  | 3792109 | 3115068439 | 26.471     | 2.70E-07   |
| CCHiC-K562-M-R2                | 43573  | 36867079  | 3770018 | 3096480594 | 37.941     | 0          |

A: Unique number of bases of mapping between PTS and Hi-C domains; B: Unique number of bases of Hi-C domains not mapping to PTS;

C: Unique number of bases of PTS not mapping to Hi-C domains and D: Total unique bases of A+B+C minus from unique bases of human genome

**[B] Chi-square test to check the mapping significance of Hi-C interaction domain with Potential Triplex Sites forming pyrimidine motif (Y).**

| Hi-C data                      | A      | B         | C       | D          | Chi-square | P value    |
|--------------------------------|--------|-----------|---------|------------|------------|------------|
| CCHiC-HeLaS3CCL2p2-G1-0.25FA   | 82325  | 68270281  | 3788326 | 3065020332 | 48.98      | 0          |
| CCHiC-HeLaS3CCL2p2-G1-1FA      | 55794  | 76505791  | 3814857 | 3056784822 | 16244.878  | 0          |
| CCHiC-HeLaS3CCL2p2-M-0.25FA    | 19776  | 16401322  | 3850875 | 3116889291 | 11.66      | 0.00063858 |
| CCHiC-HeLaS3CCL2p2-M-1FA       | 31501  | 14169338  | 3839150 | 3119121275 | 11218.995  | 0          |
| CCHiC-HeLaS3CCL2p2-M-98percent | 133789 | 26148820  | 3736862 | 3107141793 | 319903.48  | 0          |
| CCHiC-HeLaS3-G1mid-R1          | 30154  | 25088797  | 3840497 | 3108201816 | 22.866     | 0.00000174 |
| CCHiC-HeLaS3-G1mid-R2          | 17300  | 14183539  | 3853351 | 3119107074 | 2.806      | 0.09391227 |
| CCHiC-HeLaS3-M-R1              | 41223  | 34197468  | 3829428 | 3099093145 | 24.976     | 5.80E-07   |
| CCHiC-HeLaS3-M-R2              | 31762  | 26371582  | 3838889 | 3106919031 | 20.569     | 0.00000575 |
| CCHiC-HFF1-M-R1                | 129239 | 105949567 | 3741412 | 3027341046 | 21.341     | 0.00000384 |
| CCHiC-HFF1-NS-R1               | 154922 | 126891115 | 3715729 | 3006399498 | 22.252     | 0.00000239 |
| CCHiC-K562-M-R1                | 22050  | 18278666  | 3848601 | 3115011947 | 12.508     | 0.00040521 |
| CCHiC-K562-M-R2                | 44596  | 36866056  | 3826055 | 3096424557 | 19.81      | 0.00000837 |

A: Unique number of bases of mapping between PTS and Hi-C domains; B: Unique number of bases of Hi-C domains not mapping to PTS;

C: Unique number of bases of PTS not mapping to Hi-C domains and D: Total unique bases of A+B+C minus from unique bases of human genome

**[C] Chi-square test to check the mapping significance of Hi-C interaction domain with Potential Triplex Sites forming purine-pyrimidine motif (M).**

| Hi-C data                      | A      | B         | C       | D          | Chi-square | P value    |
|--------------------------------|--------|-----------|---------|------------|------------|------------|
| CCHiC-HeLaS3CCL2p2-G1-0.25FA   | 100230 | 68252376  | 4612406 | 3064196252 | 59.808     | 0          |
| CCHiC-HeLaS3CCL2p2-G1-1FA      | 112850 | 76448735  | 4599786 | 3055999893 | 41.668     | 0          |
| CCHiC-HeLaS3CCL2p2-M-0.25FA    | 24125  | 16396973  | 4688511 | 3116051655 | 12.022     | 0.00052576 |
| CCHiC-HeLaS3CCL2p2-M-1FA       | 38445  | 14162394  | 4674191 | 3118286234 | 13810.546  | 0          |
| CCHiC-HeLaS3CCL2p2-M-98percent | 162496 | 26120113  | 4550140 | 3106328515 | 387099.43  | 0          |
| CCHiC-HeLaS3-G1mid-R1          | 36568  | 25082383  | 4676068 | 3107366245 | 36.353     | 0          |
| CCHiC-HeLaS3-G1mid-R2          | 20871  | 14179968  | 4691765 | 3118268660 | 10.043     | 0.00152928 |
| CCHiC-HeLaS3-M-R1              | 50065  | 34188626  | 4662571 | 3098260002 | 36.857     | 0          |
| CCHiC-HeLaS3-M-R2              | 38560  | 26364784  | 4674076 | 3106083844 | 30.983     | 3.00E-08   |
| CCHiC-HFF1-M-R1                | 156948 | 105921858 | 4555688 | 3026526770 | 37.572     | 0          |
| CCHiC-HFF1-NS-R1               | 188468 | 126857569 | 4524168 | 3005591059 | 30.986     | 3e-8       |
| CCHiC-K562-M-R1                | 26735  | 18273981  | 4685901 | 3114174647 | 20.959     | 0.00000469 |
| CCHiC-K562-M-R2                | 54165  | 36856487  | 4658471 | 3095592141 | 30.044     | 4.00E-08   |

A: Unique number of bases of mapping between PTS and Hi-C domains; B: Unique number of bases of Hi-C domains not mapping to PTS;

C: Unique number of bases of PTS not mapping to Hi-C domains and D: Total unique bases of A+B+C minus from unique bases of human genome
