# Supplementary material for: Genome-wide computational analysis of potential long noncoding RNA mediated DNA:DNA:RNA triplexes in the human genome
Source: J Transl Med. 2017 Sep 2;15:186. doi: 10.1186/s12967-017-1282-9 (PMC7670996; doi:10.1186/s12967-017-1282-9)
Supplement: Supplementary file 4 — Additional file 4. List of all potential triplex interactions between lncRNA (RP11-84A19.2) and promoter regions of three genes (KIAA1324, PROX1, BCL9). [file 12967_2017_1282_MOESM4_ESM.pdf]

**TFO:** IncRNA      **TTS:** site on the gene promoter where IncRNA forms triplex

**TTS:** site on the gene promoter where lncRNA forms triplex

**Promoter region (1kb upstream): chr1:109655584-109656584**

**chr1**      **109656055**                  **109656090**

TFO: 3'- GAGAGAGAGAGAGAGAGAGAGAGAGAGAGAGAGAGAG -5'  
|||||  
TTS: 5'- GAGAGAGAGAGAGAGAGAGAGAGAGAGAGAGAGAGAG -3'  
3'- CTCTCTCTCTCTCTCTCTCTCTCTCTCTCTCTCTCTC -5'

**chr1**      **109656053**                  **109656090**

TFO: 3'- GAGAGAGAGAGAGAGAGAGAGAGAGAGAGAGAGAGAG -5'  
|||||  
TTS: 5'- GAGAGAGAGAGAGAGAGAGAGAGAGAGAGAGAGAGAG -3'  
3'- CTCTCTCTCTCTCTCTCTCTCTCTCTCTCTCTCTCTC -5'

**chr1**      **109656051**                  **109656090**

TFO: 3'- GAGAGAGAGAGAGAGAGAGAGAGAGAGAGAGAGAGAG -5'  
|||||  
TTS: 5'- GAGAGAGAGAGAGAGAGAGAGAGAGAGAGAGAGAGAG -3'  
3'- CTCTCTCTCTCTCTCTCTCTCTCTCTCTCTCTCTCTC -5'

**chr1**      **109656049**                  **109656091**

TFO: 3'- GAGAGAGAGAGAGAGAGAGAGAGAGAGAGAGAGAGAgttG -5'  
|||||\*\*|  
TTS: 5'- GAGAGAGAGAGAGAGAGAGAGAGAGAGAGAGAGAGAGAGG -3'  
3'- CTCTCTCTCTCTCTCTCTCTCTCTCTCTCTCTCTCTCTCC -5'

**chr1**      **109656047**                  **109656086**

TFO: 3'- GAGAGAGAGAGAGAGAGAGAGAGAGAGAGAGAGAGAGAG -5'  
|||||  
TTS: 5'- GAGAGAGAGAGAGAGAGAGAGAGAGAGAGAGAGAGAGAGAG -3'  
3'- CTCTCTCTCTCTCTCTCTCTCTCTCTCTCTCTCTCTCTCTC -5'

**chr1**      **109656045**                  **109656084**

TFO: 3'- GAGAGAGAGAGAGAGAGAGAGAGAGAGAGAGAGAGAGAG -5'  
|||||  
TTS: 5'- GAGAGAGAGAGAGAGAGAGAGAGAGAGAGAGAGAGAGAGAG -3'  
3'- CTCTCTCTCTCTCTCTCTCTCTCTCTCTCTCTCTCTCTCTC -5'

**chr1**      **109656043**                  **109656082**

TFO: 3'- GAGAGAGAGAGAGAGAGAGAGAGAGAGAGAGAGAGAGAGAG -5'  
|||||  
TTS: 5'- GAGAGAGAGAGAGAGAGAGAGAGAGAGAGAGAGAGAGAGAG -3'  
3'- CTCTCTCTCTCTCTCTCTCTCTCTCTCTCTCTCTCTCTCTC -5'

**chr1**      **109656041**                  **109656080**

TFO: 3'- GAGAGAGAGAGAGAGAGAGAGAGAGAGAGAGAGAGAGAG -5'  
|||||  
TTS: 5'- GAGAGAGAGAGAGAGAGAGAGAGAGAGAGAGAGAGAGAGAG -3'  
3'- CTCTCTCTCTCTCTCTCTCTCTCTCTCTCTCTCTCTCTCTC -5'

**chr1**      **109656037**                  **109656078**

TFO: 3'- AGGAGAGAGAGAGAGAGAGAGAGAGAGAGAGAGAGAGAGAG -5'  
|\*|||  
TTS: 5'- AAGAGAGAGAGAGAGAGAGAGAGAGAGAGAGAGAGAGAGAGAG -3'  
3'- TTCTCTCTCTCTCTCTCTCTCTCTCTCTCTCTCTCTCTCTCTC -5'

**chr1**      **109656038**                  **109656076**

TFO: 3'- AGAGAGAGAGAGAGAGAGAGAGAGAGAGAGAGAGAGAG -5'  
         |||  
TTS: 5'- AGAGAGAGAGAGAGAGAGAGAGAGAGAGAGAGAGAGAGAG -3'  
      3'- TCTCTCTCTCTCTCTCTCTCTCTCTCTCTCTCTCTCTC -5'

chr1 109656015 109656054  
TFO: 3'- GAGAGAGAGAGAGAGAGAGAGAGAGAGAGAGAGAGAG -5'  
|||||\*|||||  
TTS: 5'- GAGAGAGAGAGAGAGAGAGAGAGAAAGAGAGAGAGAGAGAG -3'  
3'- CTCTCTCTCTCTCTCTCTCTCTCTCTCTCTCTCTCTCTCTCTCTC -5'

chr1 109656014 109656052  
TFO: 3'- AGAGAGAGAGAGAGAGAGAGAGAGAGAGAGAGAGAGAGAGAGAGAG -5'  
|||||\*|||||  
TTS: 5'- AGAGAGAGAGAGAGAGAGAGAGAGAAAGAGAGAGAGAGAGAG -3'  
3'- TCTCTCTCTCTCTCTCTCTCTCTCTCTCTCTCTCTCTCTCTCTCTC -5'

chr1 109656014 109656050  
TFO: 3'- AGAGAGAGAGAGAGAGAGAGAGAGAGAGAGAGAGAGAGAGAGAGAG -5'  
|||||\*|||||  
TTS: 5'- AGAGAGAGAGAGAGAGAGAGAGAGAAAGAGAGAGAGAGAGAG -3'  
3'- TCTCTCTCTCTCTCTCTCTCTCTCTCTCTCTCTCTCTCTCTCTCTC -5'

## 2. Gene Symbol: **PROX1**

Promoter region (1kb upstream): chr1:214160843-214161843

### Potential Triplex Site (PTS):

chr1 214161764 214161799  
TFO: 3'- GAGAGAGAGAGAGAGAGAGAGAGAGAGAGAGAGAGAGAGAGAGAGAG -5'  
||||\*|||||  
TTS: 5'- GAGAGAGAGAGAGAGAGAGAGAGAGAGAGAGAGAGAGAGAGAGAGAG -3'  
3'- CTCTATCTCTCTCTCTCTCTCTCTCTCTCTCTCTCTCTCTCTCTCTC -5'

chr1 214161762 214161799  
TFO: 3'- GAGAGAGAGAGAGAGAGAGAGAGAGAGAGAGAGAGAGAGAGAGAGAG -5'  
|||||\*|||||  
TTS: 5'- GAGAGAGAGAGAGAGAGAGAGAGAGAGAGAGAGAGAGAGAGAGAGAG -3'  
3'- CTCTCTATCTCTCTCTCTCTCTCTCTCTCTCTCTCTCTCTCTCTCTC -5'

chr1 214161760 214161799  
TFO: 3'- GAGAGAGAGAGAGAGAGAGAGAGAGAGAGAGAGAGAGAGAGAGAGAG -5'  
|||||\*|||||  
TTS: 5'- GAGAGAGAGAGAGAGAGAGAGAGAGAGAGAGAGAGAGAGAGAGAGAG -3'  
3'- CTCTCTCTATCTCTCTCTCTCTCTCTCTCTCTCTCTCTCTCTCTCTCTC -5'

chr1 214161758 214161800  
TFO: 3'- GAGAGAGAGAGAGAGAGAGAGAGAGAGAGAGAGAGAGAGAGAGAGAG -5'  
|||||\*|||||\*|||||\*||  
TTS: 5'- GAGAGAGAGAGAGAGAGAGAGAGAGAGAGAGAGAGAGAGAGAGAGAG -3'  
3'- CTCTCTCTCTATCTCTCTCTCTCTCTCTCTCTCTCTCTCTCTCTCTCTCC -5'

chr1 214161756 214161795  
TFO: 3'- GAGAGAGAGAGAGAGAGAGAGAGAGAGAGAGAGAGAGAGAGAGAGAG -5'  
|||||\*|||||  
TTS: 5'- GAGAGAGAGAGAGAGAGAGAGAGAGAGAGAGAGAGAGAGAGAGAGAG -3'  
3'- CTCTCTCTCTATCTCTCTCTCTCTCTCTCTCTCTCTCTCTCTCTCTCTC -5'

chr1 214161752 214161793  
TFO: 3'- AGGAGAGAGAGAGAGAGAGAGAGAGAGAGAGAGAGAGAGAGAGAGAG -5'  
|\*|||||\*|||||  
TTS: 5'- AAGAGAGAGAGAGAGAGAGAGAGAGAGAGAGAGAGAGAGAGAGAGAG -3'  
3'- TTCTCTCTCTCTCTCTATCTCTCTCTCTCTCTCTCTCTCTCTCTCTCTC -5'

chr1 214161750 214161791  
TFO: 3'- AGGAGAGAGAGAGAGAGAGAGAGAGAGAGAGAGAGAGAGAGAGAGAG -5'  
|\*\*|||||\*|||||  
TTS: 5'- AAAAGAGAGAGAGAGAGAGAGAGAGAGAGAGAGAGAGAGAGAGAGAGAG -3'  
3'- TTTTCTCTCTCTCTCTCTATCTCTCTCTCTCTCTCTCTCTCTCTCTCTCTC -5'

**chr1**            **214161748**                      **214161789**

TFO: 3'- AGGAGAGAGAGAGAGAGAGAGAGAGAGAGAGAGAGAGAGAGAGAGAG -5'

|\*\*|\*||| ||||| |||||\*||| ||||| |||||

TTS: 5'- AAAAAAGAGAGAGAGAGAGATACAGAGAGAGAGAGAGAGAGAGAG -3'

      3'- TTTTTCCTCTCTCTCTCTCTATCTCTCTCTCTCTCTCTCTC -5'

### 3. Gene: BCL9

### Potential Triplex Sites (PTS):

**chr1**      **147012907**                  **147012946**

TFO: 3'- GAGAGAGAGAGAGAGAGAGAGAGAGAGAGAGAGAGAG -5'  
          |||||\*|||||

TTS: 5'- GAGAGAGAGAcAGAGAGAGAGAGAGAGAGAGAGAGAGAGAG -3'  
       3'- CTCTCTCTGTCTCTCTCTCTCTCTCTCTCTCTCTC -5'

**chr1**      **147012903**                  **147012942**

TFO: 3'- GAGAGAGAGAGAGAGAGAGAGAGAGAGAGAGAGAGAG -5'  
         |||||\*|||||

TTS: 5'- GAGAGAGAGAGAGAcAGAGAGAGAGAGAGAGAGAGAGAG -3'  
      3'- CTCTCTCTCTCTGTCTCTCTCTCTCTCTCTCTCTC -5'

**chr1**      **147012899**                  **147012938**

TFO: 3'- GAGAGAGAGAGAGAGAGAGAGAGAGAGAGAGAGAGAG -5'  
| | | | | | | | | | \* | | | | | | | | | | | | | | | | | | | | | |  
TTS: 5'- GAGAGAGAGAGAGAGAGACACAGAGAGAGAGAGAGAGAGAG -3'  
3'- CTCTCTCTCTCTCTCTCTGTGTCCTCTCTCTCTCTCTCTC -5'

**chr1**            **147012897**                      **147012934**

TFO: 3'- GAGAGAGAGAGAGAGAGAGAGAGAGAGAGAGAGAGAG -5'

||||| | | | | | | | | | \* | | | | | | | | | |

TTS: 5'- GAGAGAGAGAGAGAGAGAGACAGAGAGAGAGAGAGAGAG -3'

3'- CTCTCTCTCTCTCTCTCTCTCTCTCTCTCTCTCTCTCTC -5'
